# Supplementary material for: La0.6Sr0.4Co0.2Fe0.8O3−δ@(Ce0.80Gd0.20)O2 nanofibre composites as oxygen electrodes for reversible solid oxide cells
Source: Royal Society of Chemistry journal article supplement (doi:10.1039/d5nj00522a), 2025-01-01
Supplement: d5nj00522a1.pdf [file d5nj00522a1.pdf]

## Supporting Information

### **$\text{La}_{0.6}\text{Sr}_{0.4}\text{Co}_{0.2}\text{Fe}_{0.8}\text{O}_{3-\delta} @ (\text{Ce}_{0.80}\text{Gd}_{0.20})\text{O}_2$ Nanofibre Composites as Oxygen Electrodes for Reversible Solid Oxide Cells**

Keda Wang<sup>a</sup>, Jing Yu<sup>a,b\*</sup>, Yuyang Zu<sup>a</sup>

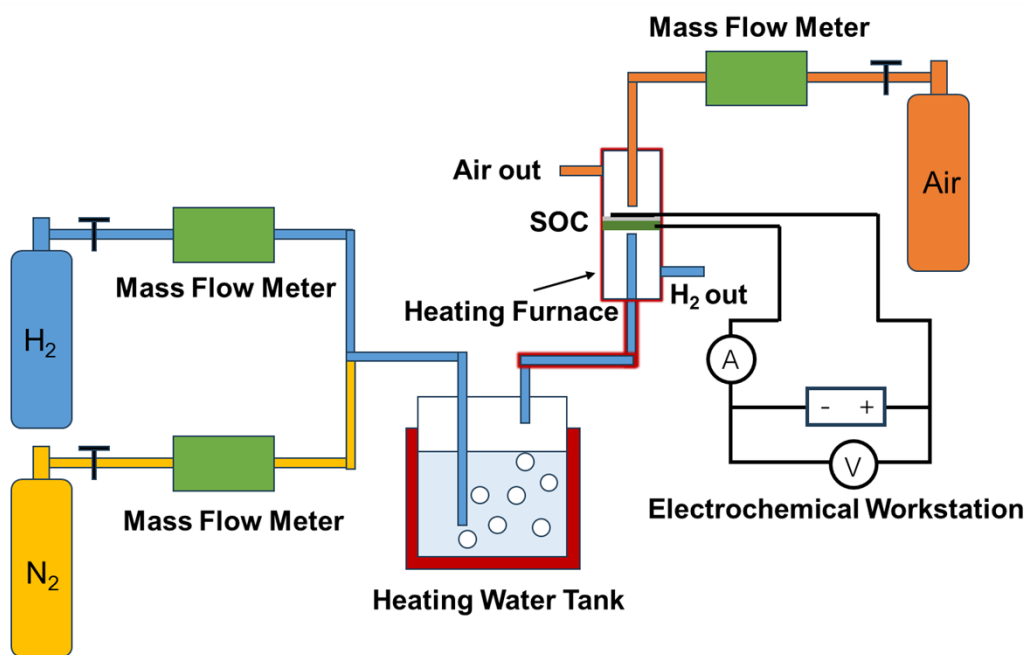

Figure S1. Schematic illustration of electrochemical measurements.

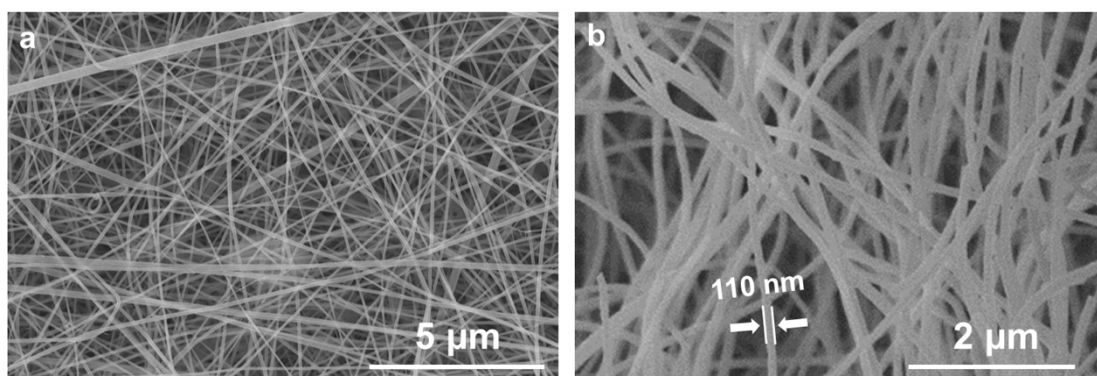

Figure S2. SEM images of LSCF@GDC precursor nanofibers before sintering.

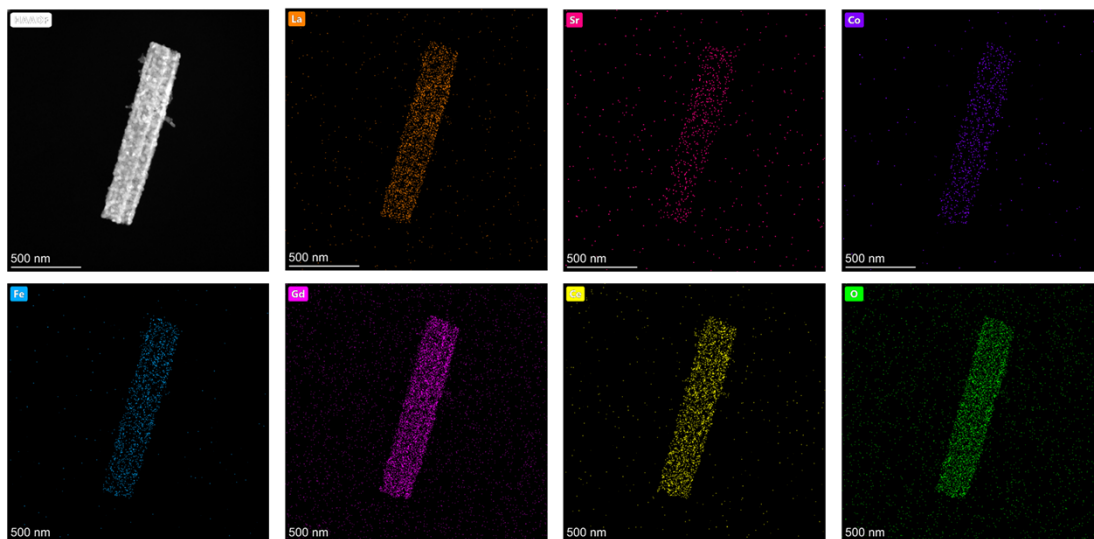

Figure S3. The HAADF image of LSCF@GDC nanofibre composite, and EDS mapping images of the corresponding elements.

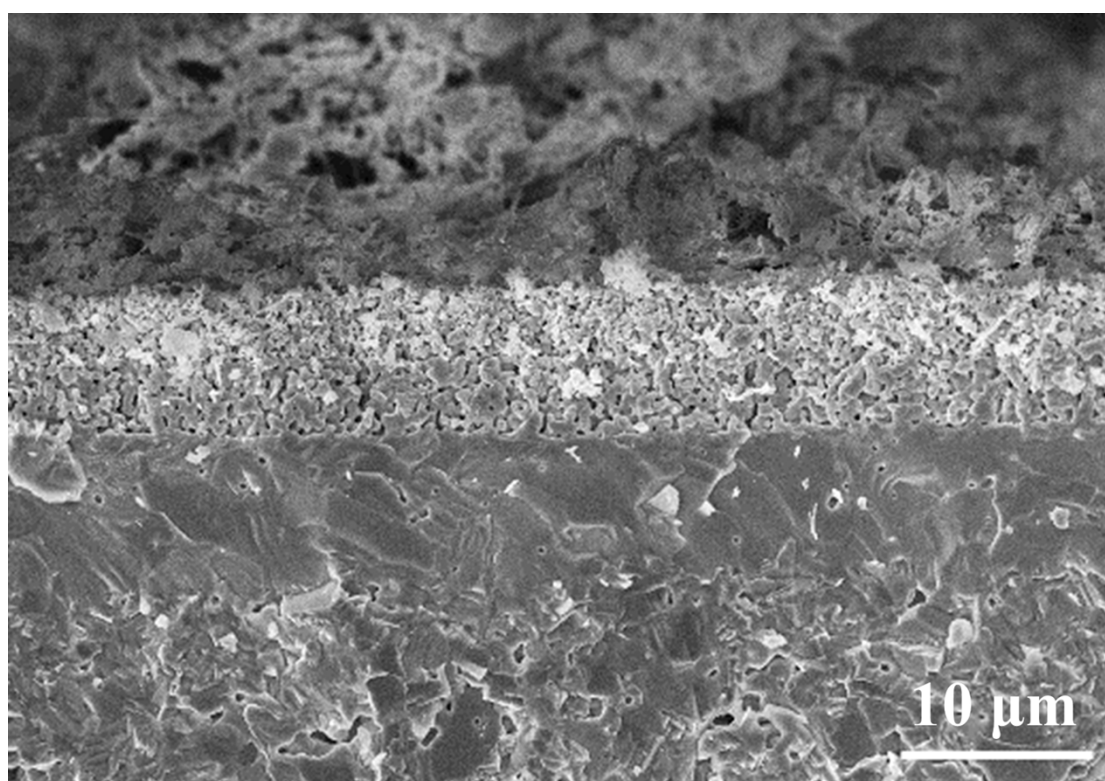

Figure S4. Cross-sectional SEM of NiO@3YSZ/8YSZ/GDC/LSCF@GDC after cycle testing.
